## RESEARCH ARTICLE

# Domestic laundering of healthcare textiles: Disinfection efficacy and risks of antibiotic resistance transmission

Caroline Cayrou, Katie Silver, Lucy Owen<sup>✉</sup>, Jake Dunlop<sup>✉</sup>, Katie Laird<sup>✉\*</sup>

Infectious Disease Research Group, Leicester School of Pharmacy, De Montfort University, Leicester, United Kingdom

<sup>✉</sup> Current address: ECHA Microbiology Ltd., Units 22 & 23 Willowbrook Technology Park, Cardiff, United Kingdom\* [klaird@dmu.ac.uk](mailto:klaird@dmu.ac.uk)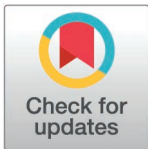

## Abstract

Hospital-acquired infections (HAIs) and antimicrobial resistance (AMR) are a major public health concern, with the evidence base for the potential role of textiles as fomites in microbial transmission growing. In the UK, domestic laundering machines (DLMs) are commonly used to clean healthcare worker uniforms, raising concerns about their effectiveness in microbial decontamination and role in AMR development. This study aimed to evaluate DLMs' ability to decontaminate microorganisms and their potential impact on AMR. The performance of six DLMs was assessed using *Enterococcus faecium* bioindicators under various wash cycles and detergent conditions. Shotgun metagenomics was used to analyse the microbiome and resistome of DLMs. The minimum inhibitory concentrations of domestic detergents were determined for *Staphylococcus aureus*, *Klebsiella pneumoniae*, and *Pseudomonas aeruginosa*, and detergent tolerance and antibiotic cross-resistance were assessed. Results showed only 50% (3/6) of DLMs achieved sufficient decontamination ( $\geq 5 \log_{10}$  CFU reduction) at 60°C during full-length cycles, with rapid cycles performing inconsistently. Microbiome analysis revealed the presence of potentially pathogenic bacteria (e.g., *Mycobacterium* sp. *Pseudomonas* sp. and *Acinetobacter* sp.) and antibiotic resistance genes, including efflux pumps and target modification genes. Detergent tolerance assays showed increased bacterial tolerance to detergents, with cross-resistance to antibiotics observed in *S. aureus* and *K. pneumoniae*, including carbapenem and  $\beta$ -lactam groups. Whole genome sequencing identified mutations in genes encoding efflux pumps in *S. aureus* (*MrgA*) and *K. pneumoniae* (*AcrB*) after detergent exposure, which could impact efflux pump function. Findings suggest domestic laundering of healthcare uniforms may be insufficient for decontamination, posing risks for HAI transmission and AMR. Revising laundering guidelines to ensure effective DLM performance, detergent efficacy, and considering alternatives like onsite/industrial laundering are crucial to enhancing patient safety and controlling AMR in healthcare settings.

## OPEN ACCESS

**Citation:** Cayrou C, Silver K, Owen L, Dunlop J, Laird K (2025) Domestic laundering of healthcare textiles: Disinfection efficacy and risks of antibiotic resistance transmission. PLoS ONE 20(4): e0321467. <https://doi.org/10.1371/journal.pone.0321467>

**Editor:** Guadalupe Virginia Nevárez-Moorillón, Universidad Autonoma de Chihuahua, MEXICO

**Received:** December 16, 2024

**Accepted:** March 6, 2025

**Published:** April 30, 2025

**Copyright:** © 2025 Cayrou et al. This is an open access article distributed under the terms of the [Creative Commons Attribution License](https://creativecommons.org/licenses/by/4.0/), which permits unrestricted use, distribution, and reproduction in any medium, provided the original author and source are credited.

**Data availability statement:** All relevant data are within the paper and its Supporting Information files apart from the genomic data files which are available from the GenBank (NCBI) database (Bio-project: PRJNA1207433) and on Figshare (<https://doi.org/10.21253/DMU.28287596>).

**Funding:** This research was funded by De Montfort University and the Textile Services Association.

**Competing interests:** The authors have declared that no competing interests exist.

## Introduction

Hospital-acquired infections (HAIs) are a common complication of hospitalisation, posing significant risks to patient safety by increasing both morbidity and mortality. Reducing the risk of HAIs is especially important considering the fact that antibiotic-resistant microorganisms are frequently associated with HAIs. Six major antibiotic-resistant bacterial species responsible of nosocomial infections have been considered as a priority or critical by the World Health Organisation [1]. These ESKAPE pathogens which refer to: *Enterococcus faecium*, *Staphylococcus aureus*, *Klebsiella pneumoniae*, *Acinetobacter baumannii*, *Pseudomonas aeruginosa* and *Enterobacter* species are often detected in healthcare settings and associated with outbreaks of disease [2].

In order to limit the risk of HAIs, infection control measures are in place within hospital environments, these particularly focus on hard surface and hand disinfection. However, there is less focus on the disinfection of healthcare textiles, which can also be a source infection. Studies have demonstrated that *P. aeruginosa*, *Escherichia coli*, *E. faecium* and *S. aureus* were able to survive at least 20 days on cotton and *E. faecium* and *S. aureus* were still viable after 7 days on polyester [3,4]. Several cases of HAIs associated with healthcare textiles have been reported, for instance, in 2002, an outbreak of Carbapenem resistant *Acinetobacter baumannii* strain was linked with contamination of privacy curtains, bed surfaces, equipment and mop heads [5]. In 2012, there was a *Bacillus cereus* outbreak in a Singapore hospital, with the source of the infection being healthcare linen [6].

In the UK effective risk management in the infection control of hospital-associated bed linen and scrubs via in house or industrial laundering is a well-controlled process designed to minimise microbial contamination, unlike healthcare uniforms, which are often domestically laundered and may not meet the same rigorous standards.

In 2021, a study estimated that >80% of the nurses (in the UK) launder their uniform using their own domestic laundry machine (DLM) [7]. In order to perform a sufficient level of cleaning and disinfection and protect healthcare workers' households from the transmission of infectious disease from their uniforms, four main recommendations are given by the "Uniforms and workwear: guidance for NHS employers" (2020): i) separate the uniforms from other domestic garments and textiles; ii) wash the textile at the highest temperature possible (60°C for 10min killing almost all bacteria and 30°C with detergent killing MRSA and most bacteria); iii) do not overload the machine and iv) clean the DLM regularly [8].

DLMs are preprogrammed and except for the temperature and the spinning speed, users cannot control or validate the washing cycle parameters. Users rely on the manufacturer programmes without being able to check if it meets the recommendations for the thermal disinfection. In addition, little is known about the long-term performance of DLMs. Finally, variation in detergent use, addition of laundry supplements and the hardness of the water can affect the laundering performance [9].

Textiles laundered in DLMs have previously been identified as sources of infectious disease outbreaks. In 2012, postsurgical infection caused by *Gordonia bronchialis* were linked to surgical scrubs contaminated by a DLM colonised by the bacteria [10]. In a neonatal ward, an extended spectrum beta lactamase producing *Klebsiella oxytoca* isolate was transmitted to new-borns and infants through knitted clothing laundered using an onsite DLM [11].

DLMs are not a sterile environment and offer conditions favourable to the formation of biofilms [12,13]. Two major bacteria classes have been detected in DLM biofilms: Alphaproteobacteria and Gammaproteobacteria [13,14]. The presence of antibiotic resistance genes has also been detected, including efflux pumps (the three most common ones being *rsmA*, *mdsB* and *ceoB*), target modificatory (EF-TU, *rpsL* and *rpoC*) and antibiotic inhibitors genes

(including AAC(6')-Ib7, *aadS*, APH(3'')-Ib and various beta-lactamase encoding genes) [15,16]. Biofilms are known to facilitate the development of antimicrobial and antiseptic resistance and tolerance to detergents in DLM biofilms has been reported [12,17]. Gattlen et al (2010) observed that *Pseudomonas putida* isolated from a DLM biofilm was able to survive detergent treatment at ten times the concentration needed to eliminate the type strain [12].

Bacterial tolerance to biocides used within the environment can contribute to cross-resistance to different groups of antibiotics. Although biocides and antibiotics differ fundamentally in their chemical properties, biocides mechanisms of action are broad targeting multiple functional and structural components of microorganisms, including cell walls, membranes, nucleic acids, and proteins [18]. In contrast, antibiotics typically target specific biochemical pathways or structures, such as the inhibition of cell wall synthesis by  $\beta$ -lactams, Fluoroquinolones inhibit the activity of topoisomerases, or Tetracyclines which inhibits protein synthesis by binding to the ribosomal 30S subunit [19].

Despite these differences, exposure to sub-lethal concentrations of biocides can enable bacteria to develop generalized mechanisms for resistance to antibiotics. Common adaptations include the overexpression of efflux transporters and altered porin expression, while some bacteria can enzymatically degrade certain biocides, such as peroxides [19]. These generalised resistance mechanisms can also confer resistance to certain antibiotics. For example, efflux pumps—often employed to expel biocides can also enable resistance to multiple antibiotic classes, including  $\beta$ -lactams and fluoroquinolones. Adkin *et al.* (2022) demonstrated sub-inhibitory concentrations of biocides can lead to antibiotic resistance, even with the absence of stable biocide tolerance [20]. Another recent study highlighted a link between efflux pumps and resistance of *P. aeruginosa* to benzalkonium chloride leading to a cross resistance to cefrimide and ciprofloxacin [21]. DLMs pose a potential risk of healthcare textiles transporting domestic detergent tolerant bacteria into a healthcare environment, feeding directly into the issue of antimicrobial resistance in a clinical setting.

In conclusion, HAIs remain a critical challenge to patient safety, particularly due to the rise of antibiotic-resistant pathogens. While robust infection control measures focus on hand and surface disinfection, healthcare textiles such as uniforms represent an underexplored yet significant fomite for microbial transmission. Domestic laundering of healthcare uniforms, widely practiced by healthcare professionals in the UK and USA, raises concerns about inadequate disinfection standards and the risks posed by biofilms in DLMs. Evidence of DLM-associated outbreaks highlights the urgent need for stricter guidelines and improved validation of washing parameters. A holistic approach to infection control, incorporating both surface disinfection and the safe management of healthcare textiles, is essential to mitigate the risks posed by HAIs and protect both patients and healthcare workers. This study aims to determine the performance and ability of DLMs to decontaminate microorganisms from textiles, establish the microbiome of DLMs including the harbouring of antibiotic resistance genes and tolerance to domestic laundry detergents, in order to establish the role of DLM in the transmission of HAIs and antibiotic resistance.

## Materials and methods

### Domestic Laundry machine performance and decontamination ability

The decontamination efficacy of six separate household DLMs was assessed using *E. faecium* ATCC 6057 bioindicators (DES Controller KT4–6, Meducomp, Germany) [22]. The DES controller bioindicators used, enclose *E. faecium* contaminated swatches in a bacteria-impermeable membrane, allowing for the safe and direct testing of the DLM's antimicrobial performance while minimising the risk of bacterial spread in a standard household setting

[22]. Two bioindicators were placed in a polycotton bag and laundered at 60°C (full-length and rapid wash cycles DLMs programs) with polycotton makeweights at the DLM maximum weight capacity (Table 1). Each wash cycle was performed with either biological (14g per kilogram of fabric) or non-biological detergents (20g per wash). The temperature and duration was monitored throughout the wash cycle using a Thermochron iButton (Measurement Systems Ltd., UK) datalogger placed in the drum alongside the makeweights and the bioindicators. The  $\log_{10}$  reduction of *E. faecium* was calculated using a semi-quantitative method. Briefly, laundered swatches ( $10^6$ – $10^3$  CFU swatches contained in the bioindicator) were placed in 10 ml tryptone soya broth (Oxoid, UK) and incubated at 37°C for 48 hours. An uninoculated broth was included as a control. Broths were inspected for growth prior to sub-culturing on nutrient and Slanetz and Bartley agar.  $\log_{10}$  CFU reductions were calculated based on positive growth on Slanetz and Bartley agar.

### Domestic laundry machine microbiome sampling, DNA extraction and quantification

A total of 12 DLMs were tested, six of which were previously tested for their performance and an additional six DLMs, were sampled to determine their microbiome diversity. Information about the machine (models and brands) and their usage (including number and type of cycles used, the type of detergent used and the frequency of machine cleansing) was obtained.

Two areas of each of the 12 selected DLMs were sampled: the entrance of the detergent drawer pipe and the bottom of the rubber seal of the drum (near the door). Sampling was conducted using a cotton swab moistened by PBS over a 25 cm<sup>2</sup> area. After sampling, the swab head was transferred to a microcentrifuge tube and stored at +4°C for a maximum of a week or stored at -80°C for longer storage period. The DNA of the organisms collected by the swab head was extracted using the FastDNA soil spin kit (MP biomedical, Germany) following the manufacturer's instructions with the following modification. The swab head was transferred to the lysis matrix E tube. Then, 978  $\mu$ l of sodium phosphate buffer was used to wash the microcentrifuge tube containing the swab. The sodium phosphate buffer was then transferred to the Lysis matrix tube with the swab head. The DNA extraction was then performed as instructed. The DNA concentration was determined using a Qubit™ 3.0 fluorometer (Invitrogen, UK) with the dsDNA Quantitation High Sensitivity kit (Invitrogen, UK).

Table 1. Domestic Laundry machine information and thermal monitoring results.

|                      |                                 | Machine          |                  |                                    |                                    |                  |                                    |
|----------------------|---------------------------------|------------------|------------------|------------------------------------|------------------------------------|------------------|------------------------------------|
|                      |                                 | B                | C                | D                                  | E                                  | F                | G                                  |
| Brand                |                                 | Hoover           | Indesit          | AEG                                | Indesit                            | Beko             | Indesit                            |
| Model                |                                 | HBWD8514DC-80    | IW007143         | 7000 series kombi                  | IWE91281                           | WDEY854P44QW     | IWSD61251 Eco                      |
| Machine Age (years)  |                                 | 4                | 2                | 3                                  | 9                                  | 1.4              | 8                                  |
| Stated Capacity (kg) |                                 | 8                | 7                | 7                                  | 9                                  | 8                | 6                                  |
| Actual Capacity (kg) |                                 | 5                | 5                | 4.75                               | 2.25                               | 4                | 3                                  |
| Full-Length Cycle    | Cycle Length                    | 1 h 55           | 2 h 40 min       | 2 h 30                             | 3 h 5 min                          | 2 h 5 min        | 1 h 52 min                         |
|                      | Peak Temperature (°C)           | 57.89 $\pm$ 0.15 | 58.14 $\pm$ 0.20 | 57.14 $\pm$ 0.29                   | <b>20.48 <math>\pm</math> 0.41</b> | 57.76 $\pm$ 0.13 | 57.05 $\pm$ 0.50                   |
|                      | Holding Time ( $\pm$ 1°C; mins) | 8.00 $\pm$ 0.71  | 10.50 $\pm$ 0.29 | 9.50 $\pm$ 1.94                    | 28.50 $\pm$ 2.75                   | 39.25 $\pm$ 0.75 | 5 $\pm$ 1.15                       |
| Rapid Cycle          | Cycle Length                    | 59 min           | 2 h 30 min       | 1 h 4 min                          | 1 h 44 min                         | 44 min           | 1 h 25 min                         |
|                      | Peak Temperature (°C)           | 56.51 $\pm$ 0.24 | 57.89 $\pm$ 0.25 | <b>44.50 <math>\pm</math> 1.90</b> | <b>19.72 <math>\pm</math> 0.48</b> | 57.14 $\pm$ 0.29 | <b>29.95 <math>\pm</math> 1.70</b> |
|                      | Holding Time ( $\pm$ 1°C; mins) | 7.00 $\pm$ 1.08  | 12.75 $\pm$ 1.31 | 2.50 $\pm$ 0.50                    | 20.50 $\pm$ 4.17                   | 10.5 $\pm$ 0.96  | 38.25 $\pm$ 7.82                   |

<https://doi.org/10.1371/journal.pone.0321467.t001>

Among the 24 samples (from 12 DLMs), 12 samples (from eight DLMs) which exhibited sufficient DNA concentrations ( $> 10\text{ng}/\mu\text{l}$ ) were analysed by shotgun metagenomic sequencing (Supplementary method 1, [Fig S1](#)).

## Bacteria strain and culture

*Staphylococcus aureus* NCTC 10788, *Klebsiella pneumoniae* NCIMB 10341, and *Pseudomonas aeruginosa* ATCC 15442 were used during this study. The bacteria strains were stored at  $-80^{\circ}\text{C}$  using Protect Beads (SLS, UK) until use. All bacterial strains were grown aerobically on nutrient agar (Oxoid, UK) at  $37^{\circ}\text{C}$  for 24h.

## Laundry detergent tolerance induction assay

The method used was adapted from Walsh *et al.*, (2003) [23]. In brief, a bacterial culture (final  $\text{OD}_{600\text{nm}}$  of 0.1) was prepared in nutrient broth (total volume 9ml) with the addition of 1ml of non-biological liquid detergent or non-biological powder detergent (non-biological detergent was selected rather than biological detergent as biological detergent contains enzymes and other potentially disruptive components that may influence the assay) at a concentration corresponding to 80% inhibition of growth or if 80% could not be reached the highest concentration allowing growth ([Fig 1](#) and [Table 2](#)) (Supplementary method 2). After 24h incubation the optical density at  $\text{OD}_{600\text{nm}}$  was measured. If the optical density was greater than 0.2, the bacteria solution was diluted to an  $\text{OD}_{600\text{nm}}$  of 0.1 in a new test tube with an increased detergent concentration of  $\times 1.5$ . If the optical density was lower than 0.2 the bacteria solution was diluted to an  $\text{OD}_{600\text{nm}}$  of 0.1 but the same concentration of detergent was used for the next passage. The bacteria were passaged up to a maximum of 20 times. If an  $\text{OD}_{600\text{nm}}$  of below 0.1 was detected, or there were 2 consecutive readings of less than 0.2 recorded, the bacteria were sub-cultured onto a nutrient agar plate and incubated for 24 hours. If growth was present, the passages were continued; if no growth was recorded the bacterium was deemed to be unable

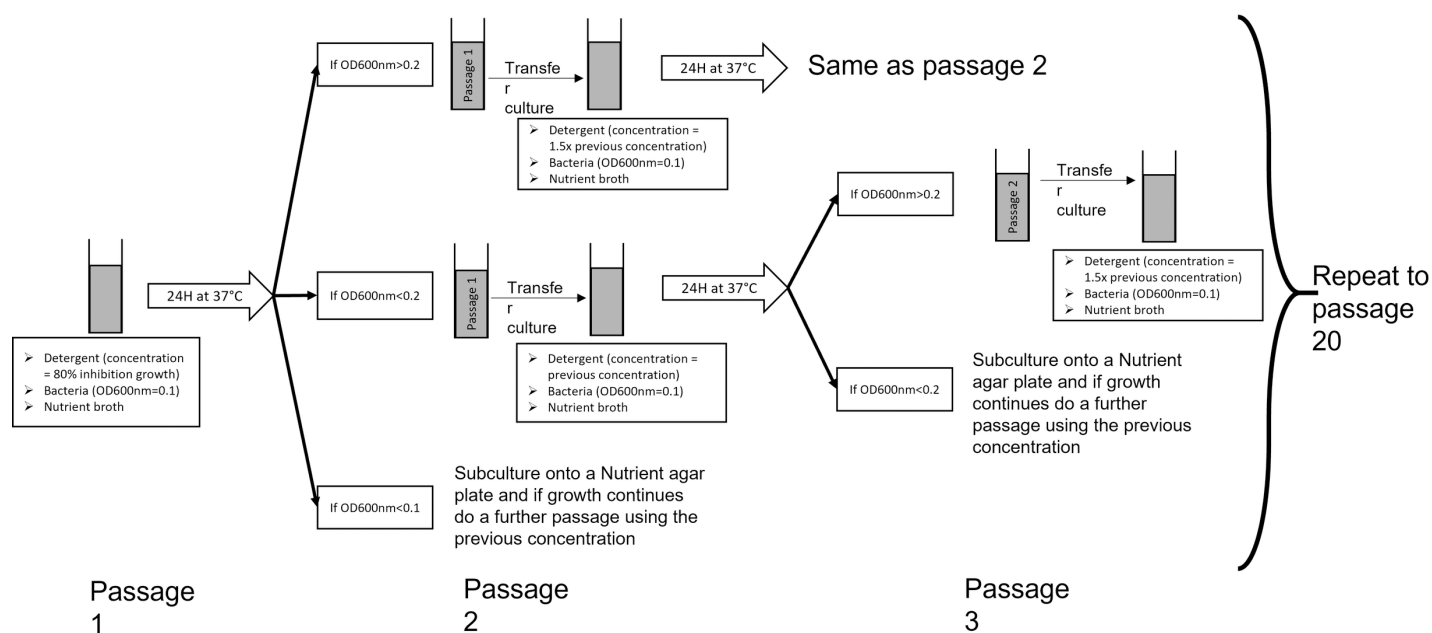

**Fig 1.** Schematic representation of the detergent tolerance induction assay.

<https://doi.org/10.1371/journal.pone.0321467.g001>



Table 2. Sublethal laundry detergent concentration and evolution of bacteria tolerance to laundry detergent after repeated exposure.

| Bacteria             | Non-Biological Detergent | Starting concentration (80% inhibition of growth) | Maximum concentration reached | % increase in concentration |
|----------------------|--------------------------|---------------------------------------------------|-------------------------------|-----------------------------|
| <i>S. aureus</i>     | Powder                   | 180 µg/ml                                         | 270 µg/ml                     | 50%                         |
|                      | Liquid                   | 0.000675 µl/ml                                    | 0.60 µl/ml                    | 89,000%                     |
| <i>K. pneumoniae</i> | Powder                   | 1800 µg/ml                                        | 4100 µg/ml                    | 128%                        |
|                      | Liquid                   | 0.000675 µl/ml                                    | 10.36 µl/ml                   | >1.5m%                      |
| <i>P. aeruginosa</i> | Powder                   | 1800 µg/ml*                                       | 2700 µg/ml                    | 50%                         |
|                      | Liquid                   | 0.00675 µl/ml                                     | 2.05 µl/ml                    | 30 000%                     |

\*68% of MIC.

<https://doi.org/10.1371/journal.pone.0321467.t002>

to survive the current concentration of the detergent. Every five passages, the bacterial solution was sub-cultured onto a nutrient agar plate. The resulting growth was used for antibiotic susceptibility testing and the colonies were harvested and preserved at -80°C on Protect Beads (SLS, UK). Negative (growth media only) and positive growth controls (bacteria and growth media) were also included.

The original *S. aureus* NCTC 10788 strain, two DLM detergent tolerant mutant *S. aureus* strains isolated after 15 passages, the original *K. pneumoniae* NCIMB 10341 strain, and one DLM detergent tolerant mutant *K. pneumoniae* strain isolated after 15 passages in the powder detergent were analysed by whole genome sequencing (WGS) (Supplementary method 3).

### Antibiotic susceptibility test

The antibiotic susceptibility of the bacteria was assessed before the start of the laundry detergent tolerance induction assay, and then every 5 passages thereafter that the bacteria exerted detergent tolerance. The method was performed using the EUCAST disk diffusion method [24] using the antimicrobial agents M14 Ring (Ampicillin 10µg, Cephalothin 5µg, Colistin Sulphate 25µg, Gentamicin 10µg, Streptomycin 10µg, Sulphatriad 200µg, Tetracycline 25µg, Cotrimoxazole 25µg) (MAST, UK) for *K. pneumoniae* and *P. aeruginosa* and M13 Ring (Chloramphenicol 25µg, Erythromycin 5µg, Fusidic acid 10µg, Oxacillin 5µg, Novobiocin 5µg, Penicillin G 1 unit, Streptomycin 10µg and Tetracycline 25µg) (MAST, UK) for *S. aureus* or a selection of clinically relevant antibiotic discs (Table 3)

The zone of inhibition was measured and compared to the EUCAST clinical breakpoints (EUCAST, 2024) to determine the sensitivity of the organism to the antibiotic [25].

### Statistical analysis

Investigations were conducted in duplicate a minimum of two separate times. All statistical analysis was conducted using SPSS (Version 29, IBM). The normality of the data was assessed using both a Q-Q plot and the Shapiro-Wilk test for normality. The observed quantiles were compared to the theoretical normal quantiles, and  $p > 0.05$  indicated the data did not significantly differ from normal distribution. Two-tailed t-tests were used to compare the laundry detergent tolerance induction assay pre-treatment zones of inhibition and post-treatment zones of inhibition. Values of  $p \leq 0.05$  were considered to be statistically significant.

## Results

### Decontamination efficacy of domestic laundry machines

Five out of the six washing machines tested at 60°C for a full-length wash had a peak temperature ranging from 57.05°C -58.14°C, held for between 5–39 minutes (Table 1 and Fig S2). A  $\geq 5$

Table 3. Clinically relevant antibiotic screened against each bacterial strain.

|                     | <i>K. pneumoniae</i><br>NCIMB 10341 | <i>P. aeruginosa</i><br>ATCC 15442 | <i>S. aureus</i><br>NCTC 10788 |
|---------------------|-------------------------------------|------------------------------------|--------------------------------|
| Amikacin 30µg *     | +                                   | +                                  |                                |
| Aztreonam 30µg *    | +                                   | +                                  |                                |
| Cefoxitin 30µg *    |                                     |                                    | +                              |
| Cefpodoxime 10µg *  | +                                   |                                    |                                |
| Ceftazidime 10µg *  | +                                   | +                                  |                                |
| Ciprofloxacin 5µg ^ | +                                   | +                                  | +                              |
| Ertapenem 10µg *    | +                                   |                                    |                                |
| Erythromycin 15µg ^ |                                     |                                    | +                              |
| Fusidic Acid 10µg * |                                     |                                    | +                              |
| Linezolid 10µg *    |                                     |                                    | +                              |
| Meropenem 10µg *    | +                                   | +                                  |                                |
| Moxifloxacin 5µg *  | +                                   |                                    | +                              |
| Rifampicin 5µg *    |                                     |                                    | +                              |
| Tetracycline 30µg ^ |                                     |                                    | +                              |
| Vancomycin 30µg ^   |                                     |                                    | +                              |

+ Antibiotic tested with the corresponding bacteria species.

\* Oxoid, UK.

^ SLS, UK.

<https://doi.org/10.1371/journal.pone.0321467.t003>

log<sub>10</sub> CFU reduction was achieved by four of the five machines using full-length cycles (Table 4). Machine E reached a mean peak temperature of 20.48°C for 28.5 minutes and did not result in an observable reduction in *E. faecium* (Tables 1 and 4).

Of the rapid wash cycles, 50% of the six machines did not reach the stated 60°C ±4°C (measured temperature, 19.72°C–44.5°C), and failed to decontaminate *E. faecium* (<5 log<sub>10</sub> CFU reduction; Tables 1 and 4). Conversely, two machines reached a peak temperature of 56.51°C–57.89°C for 7–13 minutes and achieved a ≥5 log<sub>10</sub> CFU reduction. One machine (B) achieved a 6 log<sub>10</sub> CFU reduction when decontaminated using a rapid cycle with a non-biological detergent. However, its decontamination efficacy was variable when using a biological detergent, achieving a reduction of ≥4 log<sub>10</sub> CFU.

### Domestic machine microbiome and resistome

After DNA extraction, only 12 samples (from eight different DLM) reached a DNA concentration greater than 10ng/µl. Those 12 samples were further analysed by shotgun metagenomic

Table 4. Log<sub>10</sub> reduction of *E. faecium* bioindicators following domestic laundering using a 60°C full-length or rapid wash cycle (n=4).

| Machine | Full-Length 60°C |                | Rapid 60°C |                |
|---------|------------------|----------------|------------|----------------|
|         | Biological       | Non-Biological | Biological | Non-Biological |
| B       | 0                | 6              | ≥4         | 6              |
| C       | 6                | 6              | 6          | 6              |
| D       | 6                | 6              | 0          | 0              |
| E       | 0                | 0              | 0          | 0              |
| F       | ≥5               | 5              | 5          | 6              |
| G       | 0                | 0              | 0          | 0              |

Green – pass (≥5 log<sub>10</sub> reduction); Red – fail (<5 log<sub>10</sub> reduction).

<https://doi.org/10.1371/journal.pone.0321467.t004>

sequencing (Table 5). Eight samples were pairs (detergent pipe and door rubber) from four DLM (pairs A1/A2, E1/E2, H1/H2 and M1/M2) and four samples were single samples from four different DLM (C1, F2, L1 and O1). The usage survey results are summarised in Table 5.

The microbiome analysis of the samples showed that three main classes of bacteria represented >60% of the bacteria detected in all the samples: Actinomycetes, Gammaproteobacteria and Alphaproteobacteria (Fig 2a). The ten most common genera among the samples were *Pseudomonas*, *Mycobacterium*, *Gordonia*, *Acinetobacter*, *Mycolicibacterium*, *Actinomycetosporea*, *Amaricoccus*, *Mycobacteroides*, *Pseudonocardia* and *Pseudoxanthomonas* (Fig 2b). Three sample pairs (A1/A2, E1/E2 and M1/M2) showed different microbiome profiles between the detergent pipe sample and the drum rubber sample even though they were sampled from the same machine. The major genus detected in sample A1 was *Mycobacterium* and for A2 it was *Gordonia*. For DLM E the major genus detected was *Actinomycetosporea* in the detergent pipe (E1) and *Pseudoxanthomonas* in the drum rubber sample (E2). The samples M1 and M2 exhibited as major genera *Gordonia* and *Pseudomonas* respectively. One machine (H) exhibited the same major genus: *Pseudomonas* (Fig 2b) within the DLM sample pair. In all the samples, the presence of genera containing known pathogenic bacteria species was detected

**Table 5. Results survey domestic machine usage and DNA concentration.**

| Sample Name | Sampling zone | DNA concentration (ng/μl) | Machine code | Detergent type used | Use of Softener | Detergent addition location | At least one wash >50°C per month | Machine age <sup>†</sup> | Use machine cleanser |
|-------------|---------------|---------------------------|--------------|---------------------|-----------------|-----------------------------|-----------------------------------|--------------------------|----------------------|
| A1#         | Pipe          | 22.6                      | A            | Non-biological      | No softener     | Drum                        | No                                | Old                      | No                   |
| A2#         | Seal          | 190                       |              |                     |                 |                             |                                   |                          |                      |
| B1          | Pipe          | 0.19                      | B            | Non-biological      | No softener     | Compartment                 | Yes                               | New                      | Yes                  |
| B2          | Seal          | LLD                       |              |                     |                 |                             |                                   |                          |                      |
| C1#         | Pipe          | 76.8                      | C            | Non-biological      | Softener        | Compartment                 | No                                | New                      | No                   |
| C2          | Seal          | 1.08                      |              |                     |                 |                             |                                   |                          |                      |
| D1          | Pipe          | 2.68                      | D            | Non-biological      | Softener        | Drum                        | Yes                               | New                      | No                   |
| D2          | Seal          | 2.94                      |              |                     |                 |                             |                                   |                          |                      |
| E1#         | Pipe          | 20.2                      | E            | Biological          | No softener     | Drum                        | No                                | Old                      | No                   |
| E2#         | Seal          | 68.2                      |              |                     |                 |                             |                                   |                          |                      |
| F1          | Pipe          | 0.924                     | F            | Non-biological      | No softener     | Compartment                 | No                                | New                      | Yes                  |
| F2#         | Seal          | 21.8                      |              |                     |                 |                             |                                   |                          |                      |
| G1*         | Pipe          | 1                         | G            | N/A                 | No softener     | N/A                         | N/A                               | Old                      | Yes                  |
| G2*         | Seal          | 4.32                      |              |                     |                 |                             |                                   |                          |                      |
| H1#         | Pipe          | 57                        | H            | Biological          | Softener        | Compartment                 | No                                | Old                      | Yes                  |
| H2#         | Seal          | 114                       |              |                     |                 |                             |                                   |                          |                      |
| L1#         | Pipe          | 92                        | L            | Non-biological      | Softener        | Drum                        | Yes                               | Old                      | No                   |
| L2          | Seal          | 5.68                      |              |                     |                 |                             |                                   |                          |                      |
| M1#         | Pipe          | 21.2                      | M            | Biological          | Softener        | Drum                        | No                                | Old                      | Yes                  |
| M2#         | Seal          | 22.8                      |              |                     |                 |                             |                                   |                          |                      |
| N1          | Pipe          | 1.99                      | N            | Non-biological      | Softener        | Drum                        | Yes                               | New                      | No                   |
| N2          | Seal          | 1.68                      |              |                     |                 |                             |                                   |                          |                      |
| O1#         | Pipe          | 46.4                      | O            | Non-biological      | No softener     | Drum                        | Yes                               | New                      | No                   |
| O2          | Seal          | LLD                       |              |                     |                 |                             |                                   |                          |                      |

LLD= lower than the limit of detection

\*DLM located in a research laboratory used for research purpose only.

<sup>†</sup>Old >4 years; New ≤ 4 years. # Samples used for the shotgun metagenomic sequencing

N/A: non-applicable as the usage conditions are extremely variable due to DLM research purpose.

<https://doi.org/10.1371/journal.pone.0321467.t005>



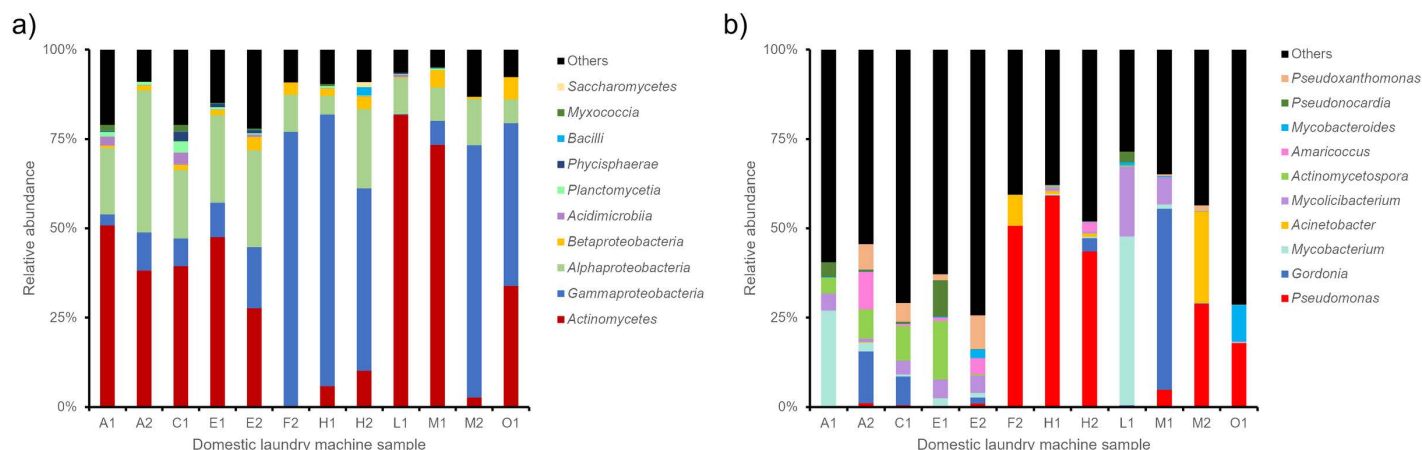

**Fig 2. Relative abundance of the ten most common classes and genera among the samples. a) Relative abundance of microbial classes b) Relative abundance of bacteria genera.**

<https://doi.org/10.1371/journal.pone.0321467.g002>

(Table 6). Three genera showed a relative abundance greater than 1% of the total bacteria: *Acinetobacter* (9–28%), *Mycobacterium* (1–49%) and *Pseudomonas* (1–61%). For 11 samples, at least one of the three genera above represented more than 1% of the detected bacteria and for eight samples at least one represented more than 10% of the detected bacteria (Table 6).

Antibiotic resistance genes could be detected in all the samples sequenced. The ten most common genes are listed in Table 7 and Fig 3. Five genes encode for efflux pumps (*adeF*, *qacG*, *rsmA*, *abaQ* and *abeS*), three genes encode for altered variants of the antibiotic targets (*vanYB*, *vanWI* and *vanG*), one gene encodes an antibiotic inhibitor (ANT 3" IIC) and one gene is involved in the expression of efflux pumps and genes altering the antibiotic targets (*soxR*) (Table 7).

**Table 6. Relative abundance of potentially pathogenic genera detected in domestic laundry machine microbiome. Light grey is genera with relative abundance  $\geq$  1%, genera with a relative abundance  $\geq$  10% highlighted in dark grey.**

|                         | Percentage of total bacteria detected in each sample <sup>a</sup> |        |        |        |        |         |         |        |         |        |        |         |
|-------------------------|-------------------------------------------------------------------|--------|--------|--------|--------|---------|---------|--------|---------|--------|--------|---------|
|                         | A1                                                                | A2     | C1     | E1     | E2     | F2      | H1      | H2     | L1      | M1     | M2     | O1      |
| <i>Acinetobacter</i>    | 0.002                                                             | 0.2    | 0.009  | 0.007  | 0.05   | 9       | 0.9     | 0.9    | 0.001   | 0.004  | 28     | 0.03    |
| <i>Bacillus</i>         | 0.007                                                             | 0.005  | 0.006  | 0.007  | 0.009  | 0.009   | 0.002   | 0.4    | 0.0004  | 0.01   | 0.002  | 0.00002 |
| <i>Citrobacter</i>      | 0.002                                                             | 0.0001 | 0.0002 | 0.0005 | 0.0003 | 0.0004  | 0.001   | 0.0003 | 0.00003 | 0.0009 | 0.001  | 0.0002  |
| <i>Clostridioides</i>   | 0.000003                                                          | 0.02   | 0.02   | 0.0005 | 0.006  | 0.00001 | 0.00001 | 0.001  | 0.0002  | 0.0003 | ND     | 0.00001 |
| <i>Enterobacter</i> *   | 0.0003                                                            | 0.0005 | 0.002  | 0.001  | 0.0006 | 0.01    | 0.2     | 0.002  | 0.0007  | 0.002  | 0.2    | 0.008   |
| <i>Enterococcus</i> *   | 0.001                                                             | 0.0003 | 0.001  | 0.001  | 0.001  | 0.0005  | 0.0002  | 0.0003 | 0.0004  | 0.0008 | 0.0009 | ND      |
| <i>Escherichia</i>      | 0.002                                                             | 0.001  | 0.004  | 0.002  | 0.001  | 0.009   | 0.005   | 0.008  | 0.002   | 0.001  | 0.009  | 0.005   |
| <i>Klebsiella</i> *     | 0.001                                                             | 0.002  | 0.005  | 0.001  | 0.003  | 0.02    | 0.03    | 0.02   | 0.0005  | 0.001  | 0.02   | 0.01    |
| <i>Mycobacterium</i>    | 29                                                                | 3      | 0.6    | 2      | 1      | 0.001   | 0.3     | 0.4    | 49      | 1      | 0.002  | 0.2     |
| <i>Pseudomonas</i> *    | 0.06                                                              | 1      | 0.5    | 0.1    | 1      | 52      | 61      | 46     | 0.05    | 5      | 31     | 18      |
| <i>Staphylococcus</i> * | 0.004                                                             | 0.0001 | 0.0008 | 0.0007 | 0.0007 | 0.0001  | 0.0004  | 0.006  | 0.0004  | 0.0002 | 0.001  | 0.003   |
| <i>Streptococcus</i>    | 0.0007                                                            | 0.0004 | 0.0003 | 0.0001 | 0.0006 | 0.001   | 0.003   | 0.002  | ND      | 0.0001 | 0.002  | 0.0008  |

<sup>a</sup>Each letter and digit combination correspond to one DLM and sample site.

ND= Not detected

\*Genera containing species belonging to the ESKAPE pathogens

<https://doi.org/10.1371/journal.pone.0321467.t006>

### Sublethal concentrations of domestic laundry detergent

Sublethal concentrations (see Supplementary method 2) (80% growth inhibition) for *S. aureus* were 0.000675 µl/ml for the liquid detergent, and 180 µg/ml for powder detergent. For *K. pneumoniae* 0.000675 µl/ml was required for the liquid detergent, and 1800 µg/ml for the powder detergent. The sublethal concentrations for *P. aeruginosa* were 0.00675 µl/ml for

**Table 7. Antibiotic resistance genes detected in domestic laundry machines. The resistance genes are ranked from the highest frequency (top) to the lowest frequency (bottom) among all the samples. Only the 10 most frequent ones are listed. Gene data were extracted from the CARD database. Blue= Genes encoding efflux pumps; Yellow=Genes encoding an antibiotic inhibitor; Green= Genes involved in antibiotic targets alteration; and Grey=Genes involved in different antibiotic.**

| Gene                          | Resistance mechanism                               | Drug class                                                                                                                                                               |
|-------------------------------|----------------------------------------------------|--------------------------------------------------------------------------------------------------------------------------------------------------------------------------|
| <i>adeF</i>                   | Antibiotic efflux                                  | Tetracycline antibiotic, fluoroquinolone antibiotic                                                                                                                      |
| <i>qacG</i>                   | Antibiotic efflux                                  | Disinfecting agents and antiseptics                                                                                                                                      |
| <i>vanYB</i>                  | Antibiotic target alteration                       | Glycopeptide antibiotic                                                                                                                                                  |
| <i>vanWI</i>                  | Antibiotic target alteration                       | Glycopeptide antibiotic                                                                                                                                                  |
| <i>ANT 3<sup>''</sup> IIC</i> | Antibiotic inactivation                            | Aminoglycoside antibiotic                                                                                                                                                |
| <i>vanG</i>                   | Antibiotic target alteration                       | Glycopeptide antibiotic                                                                                                                                                  |
| <i>rsmA</i>                   | Antibiotic efflux                                  | Diaminopyrimidine antibiotic, phenicol antibiotic, fluoroquinolone antibiotic                                                                                            |
| <i>soxR</i>                   | Antibiotic efflux and Antibiotic target alteration | Tetracycline antibiotic, cephalosporin, penam, fluoroquinolone antibiotic, phenicol antibiotic, disinfecting agents and antiseptics, rifamycin antibiotic, glycylcycline |
| <i>abaQ</i>                   | Antibiotic efflux                                  | Fluoroquinolone antibiotic                                                                                                                                               |
| <i>abeS</i>                   | Antibiotic efflux                                  | Macrolide antibiotic, aminocoumarin antibiotic                                                                                                                           |

<https://doi.org/10.1371/journal.pone.0321467.t007>

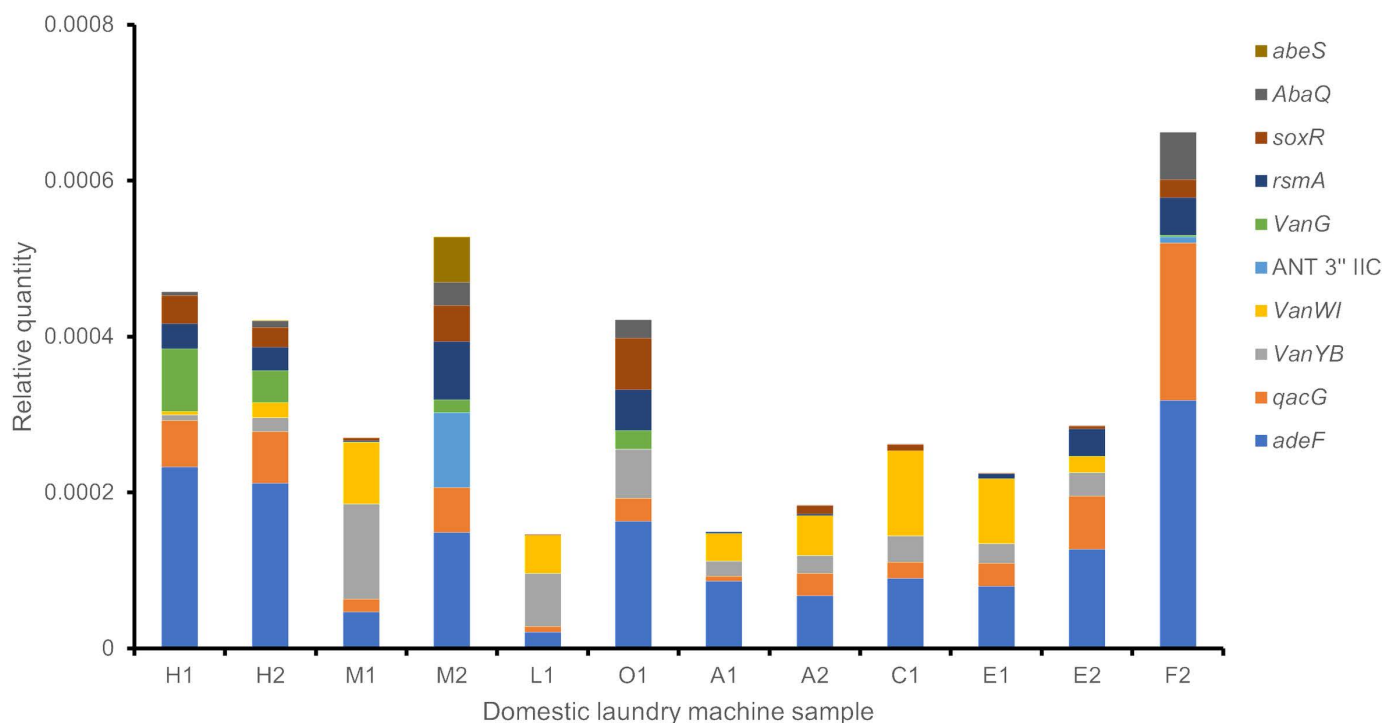

**Fig 3. Abundance of resistance genes in each DLM samples. The 10 most abundant resistance genes in the samples are displayed.**

<https://doi.org/10.1371/journal.pone.0321467.g003>

liquid detergent, for the powder detergent only a 68% inhibition was achievable at 1800 µg/ml. Growth inhibition couldn't be achieved at 80% of *P. aeruginosa*, therefore, 68% inhibition of growth was used for the induction assay.

### Laundry detergent tolerance and cross resistance to antibiotics

During the laundry detergent tolerance induction assay, the detergent concentration was increased by at least one stable (1.5x) increase of the sublethal starting concentration for all bacterial strains and detergent types tested. The powdered non-biological detergent exhibited the lowest number of stable increases of the sublethal starting concentration for all the bacteria strains (Table 2). *S. aureus* increased from 180 µg/ml to 270 µg/ml (a 50% increase), *K. pneumoniae* increased from 1800 µg/ml to 4100 µg/ml (a 128% increase), and *P. aeruginosa* increased from 1800 µg/ml to 2700 µg/ml (a 50% increase). Whilst liquid laundry detergent consistently demonstrated a higher number of stable increases of the sublethal starting concentration (Table 2). *S. aureus* increased from 0.000675 µl/ml to 0.60 µl/ml (an 89,000% increase), *K. pneumoniae* increased from 0.000675 µl/ml to 10.36 µl/ml (a >1.5m% increase), and *P. aeruginosa* from 0.00675 µl/ml to 2.05 µl/ml (a 30,000% increase) (Table 2).

Both *S. aureus* and *K. pneumoniae* were screened against eight antibiotics as part of the M13/14 Rings. Only four of these were considered for *P. aeruginosa* in the M14 ring due to Ampicillin 10µg, Cephalothin 5µg, Sulphatriad 200µg, and Cotrimoxazole 25µg being ineffective against *Pseudomonas*. After 20 passages in both liquid and powder detergent, all antibiotics tested against *P. aeruginosa* demonstrated a decrease in zone of inhibition (ZoI), except for Cefazidime 10µg (a 1mm increase in ZoI). The greatest difference observed pre and post exposure to detergent was for Streptomycin with 3.71mm and 4mm ZoI reduction for the liquid and the powder detergents respectively (Fig 4, Table S1). Based on the EUCAST sensitivity breakpoint, *P. aeruginosa* is clinically susceptible to the antibiotics tested before and after exposure to laundry detergents. *P. aeruginosa* was fully resistant to four of the eight M14 ring antibiotics (Ampicillin 10µg, Cephalothin 5µg, Sulphatriad 200µg, and Cotrimoxazole 25µg) prior the treatment with the detergents and remained resistant after repeated exposure to the detergents. In *P. aeruginosa* a significant correlation between detergent exposure/concentration and decrease in ZoI against antibiotics was observed ( $p \leq 0.05$ ) independently of the detergent form (powder or liquid).

There is a significant correlation between detergent exposure and the changes in antibiotic ZoI observed ( $p \leq 0.05$ ) in *K. pneumoniae*. The largest change in the ZoI seen against *Klebsiella pneumoniae* was for Meropenem 10µg, which had a difference of 14.12mm when exposed to domestic non-biological powder (Fig 5, Table S2). When exposed to liquid detergent the largest change was observed with Ampicillin 10µg (-7.41mm). Two instances of the induction of cross-resistance to antibiotics were observed following powder detergent exposure: Meropenem 10µg, and Ertapenem 10µg. Following exposure to powder and liquid detergents, the general trend observed was an increase in ZoI when antibiotics were tested against *K. pneumoniae*. There were five occurrences of an increased ZoI when antibiotics (Moxifloxacin 5µg (liquid), Aztreonam 30 µg (both), Amikacin 30 µg (powder), and Sulphatriad 200 µg (powder)) were tested against *K. pneumoniae*.

*S. aureus* had variable changes to sensitivity in both directions to the antibiotics after exposure to DLM detergent. Rifampicin 5µg screening demonstrated a 7.73mm decrease in ZoI, while the largest increase in ZoI was against linezolid 10µg, which increased by 9.43mm (Fig 6, Table S3). A significant relationship was observed between domestic liquid detergent exposure and a decrease in the ZoI observed in *S. aureus* ( $p \leq 0.05$ ). However, there was no significant relationship identified between the powder detergent exposure, and the resistance profiles in the post treatment strain ( $p \geq 0.05$ ).

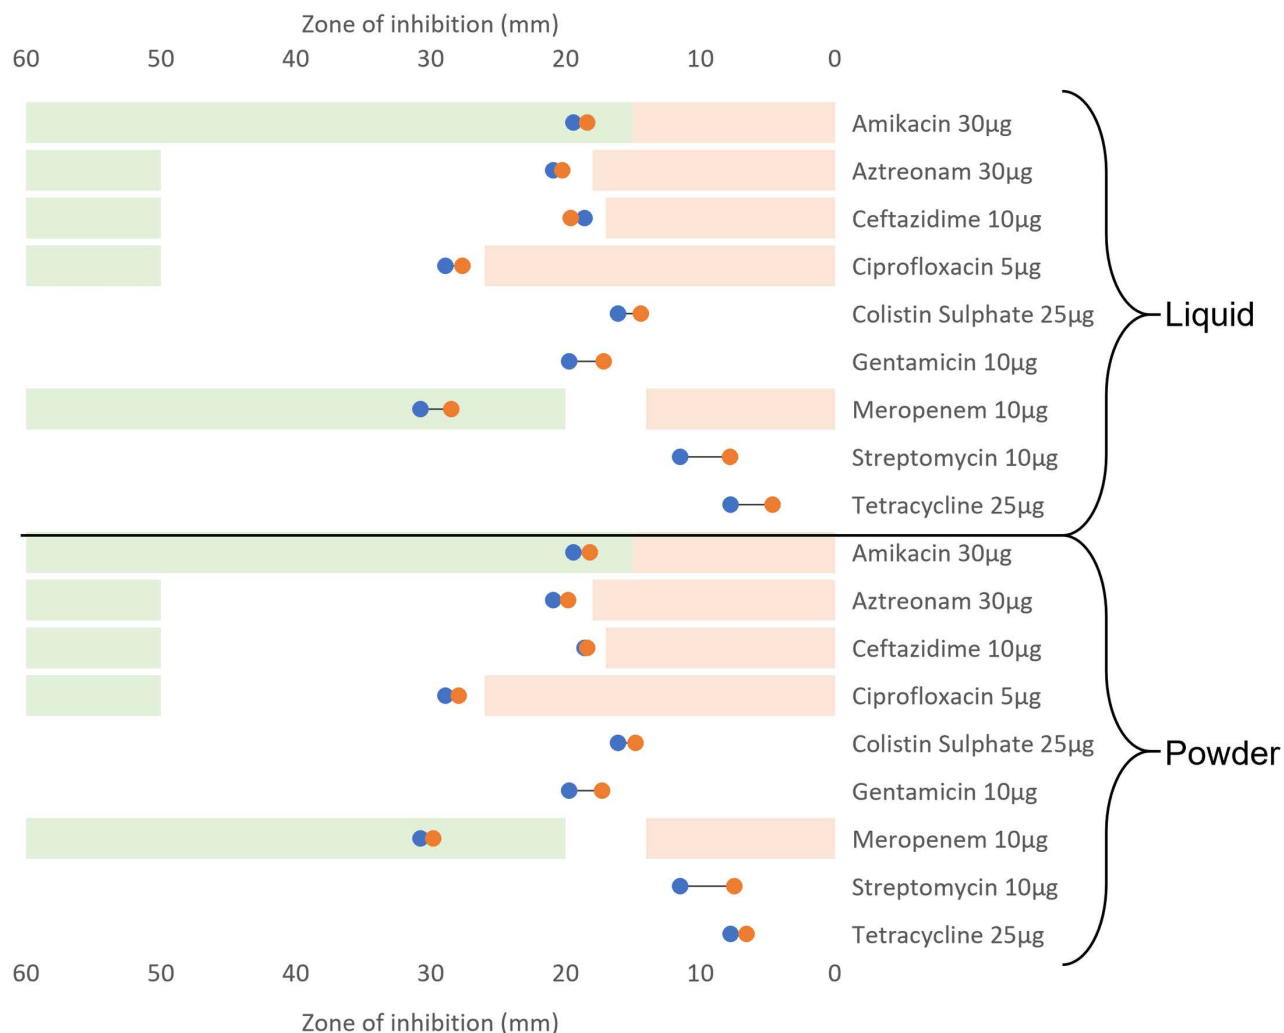

**Fig 4. *P. aeruginosa* antibiotic resistance profile before and after repeated exposure to laundry detergents (liquid or powdered).** Blue markers represent the mean ZOI before exposure to the detergents. Orange markers represent the mean ZOI after exposure to the detergents. The green areas indicate each antibiotic susceptibility area based on the EUCAST (2024) breakpoints [25], the white areas represent the intermediary susceptibility, and the light red areas represent the antibiotic resistance area. When the antibiotic is not clinically relevant no areas is highlighted.

<https://doi.org/10.1371/journal.pone.0321467.g004>

Across all the bacterial species tested, there were nine instances of cross-resistance to antibiotics from exposure to domestic laundry detergents. *K. pneumoniae* exposure to powder detergent induced cross resistance to Ertapenem 10µg (a ZOI reduction of 10.38mm) and Meropenem 10µg (a ZOI reduction of 14.12mm). *S. aureus* assays demonstrated, seven antibiotic resistances. *S. aureus* exposed to liquid detergent became resistant to Moxifloxacin 5µg (a ZOI reduction of 0.9mm), Fusidic Acid 10µg (a ZOI reduction of 1.83mm), and Penicillin G 1 Unit (a 4.32mm ZOI reduction). *S. aureus* exposed to powder detergents then demonstrated resistance to Tetracycline 3µg (a ZOI reduction of 4.21mm), Rifampicin 5 µg (a 7.73mm reduction of the ZOI), Penicillin G 1 unit (a reduction of 5.75mm to the ZOI), and Oxacillin 5µg (a ZOI reduction of 6.72mm).

### Whole Genome Sequencing of antibiotic cross-resistant strains

The WGS analysis showed the presence of a single nucleotide polymorphism (SNP) in the genome of *S. aureus* following exposure to the liquid detergent. This SNP was detected in the

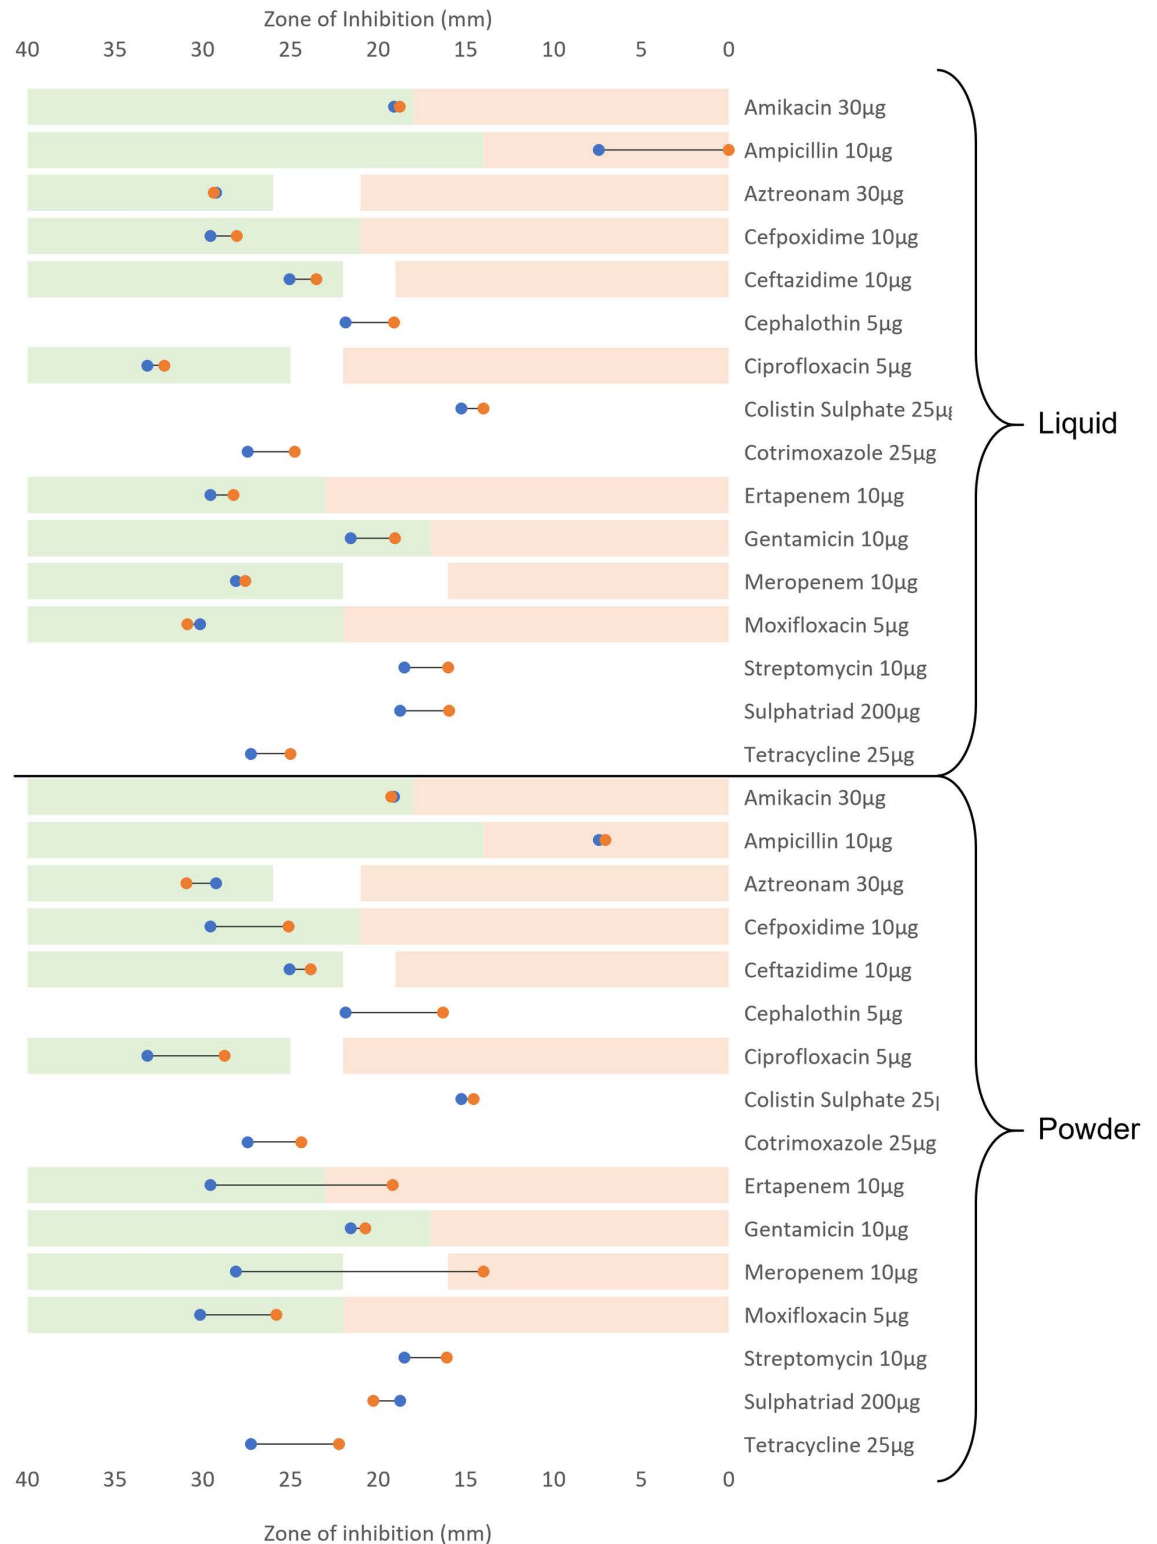

**Fig 5.** *K. pneumoniae* antibiotic resistance profile before and after repeated exposure to laundry detergents (liquid or powdered). Blue markers represent the mean ZoI before exposure to the detergents. Orange markers represent the mean ZoI after exposure to the detergents. The green areas indicate each antibiotic susceptibility area based on the EUCAST (2024) breakpoints [25], the white areas represent the intermediary susceptibility, and the light red areas represent the antibiotic resistance area. When the antibiotic is not clinically relevant no areas is highlighted.

<https://doi.org/10.1371/journal.pone.0321467.g005>

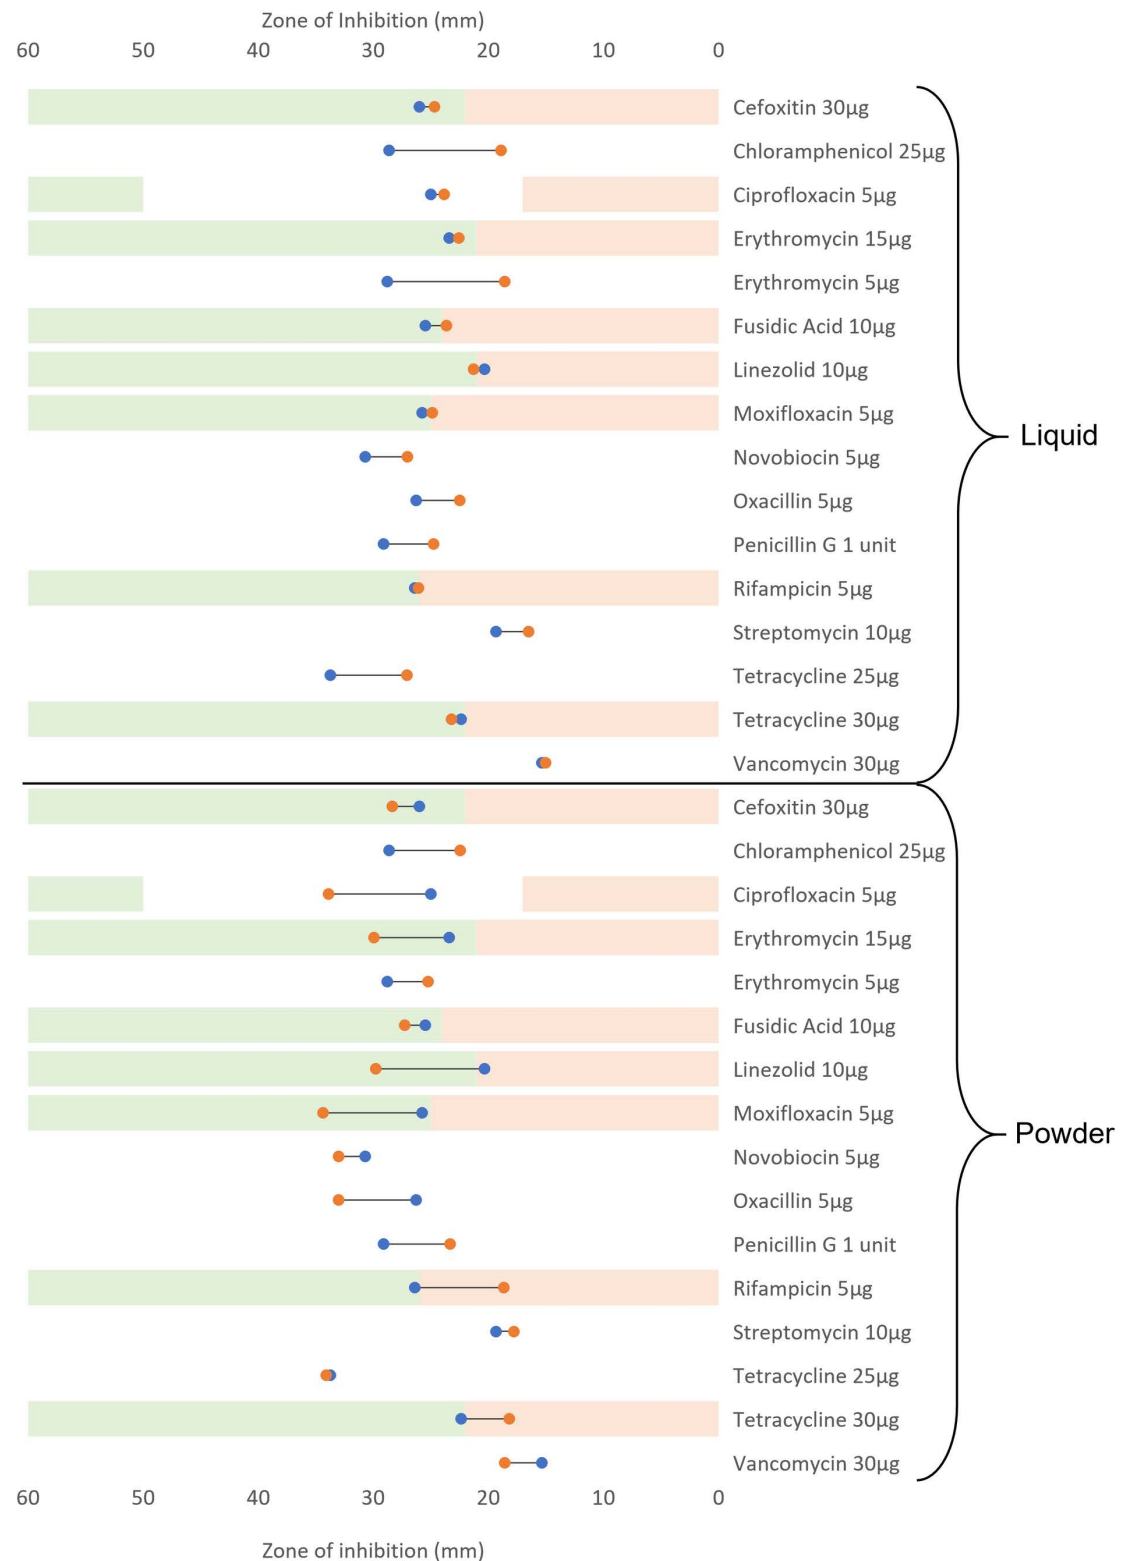

**Fig 6. *S. aureus* antibiotic resistance profile before and after repeated exposure to laundry detergents (liquid or powdered).** Blue markers represent the mean ZOI before exposure to the detergents. Orange markers represent the mean ZOI after exposure to the detergents. The green areas indicate each antibiotic susceptibility area based on the EUCAST (2024) breakpoints [25], the white areas represent the intermediary susceptibility, and the light red areas represent the antibiotic resistance area. When the antibiotic is not clinically relevant no areas is highlighted.

<https://doi.org/10.1371/journal.pone.0321467.g006>



coding region of the *Mgra* gene and induced a non-synonymous missense mutation substituting an arginine by histidine in the amino acid sequence. Two different SNPs were identified in *K. pneumoniae* genome following exposure to detergent powder. The first SNP was detected in the *AcrB* gene, encoding a multidrug efflux RND (Resistance Nodulation-Division) transporter permease. The presence of the SNP in the post treatment isolate induces the substitution of a stop codon with a tryptophan in the AcrB protein. The second SNP is located in the *murB* gene and induces a silent mutation and thus no amino acid change occur in the protein sequence.

## Discussion

The performance of domestic laundry machines (DLMs) in achieving effective disinfection presents significant challenges, particularly in the context of healthcare worker uniforms, which could act as fomites for HAIs. Variability in DLM cycle parameters, such as temperature and duration, raises concerns about their reliability in reaching the disinfection standards necessary to eliminate pathogenic microorganisms. This issue is compounded by the limited efficacy of domestic detergents when used below the concentration required to kill microorganisms and the potential for biofilm formation within DLMs, creating an environment conducive to antimicrobial resistance. Understanding these risks and their implications is critical to improving laundering practices, safeguarding healthcare environments, and addressing the broader challenge of infection control.

The performance of DLMs varied between machines, with an important variation in cycle lengths and temperature profiles. Of particular significance is that all DLMs did not reach the target temperature of 60°C during a rapid wash cycle and 50% (3/6) and 33% (2/6) failed to achieve disinfection (Tables 1 and 4) when using a short wash cycle and standard wash cycle respectively. Only two of the DLMs could maintain their peak temperature >57°C for the Department of Health recommended 10 minutes, although the temperature maintained was below that of the 60°C recommended [8]. This suggests that even if healthcare workers thought they were disinfecting their uniforms at 60°C for 10 minutes there is a high possibility that the machine used will not perform as expected. During this study, three DLMs (50%) did not reach temperature (60°C ±4°C) and maintain it for 10 minutes and disinfection was not achieved despite the presence of detergent (Table 4). It is however difficult to determine the antimicrobial efficacy of the detergent itself from this study investigations. Several studies have showed that the HAI organisms MRSA and *A. baumannii* and other Gram-negative bacteria can survive washes performed under 60°C without detergent [26,27]. If the temperature to disinfect textiles (60°C) can't be reached then importance should be given to the laundry detergent. Standard domestic detergents are not necessarily designed for disinfection and may not be able to kill bacteria so priority should be given to detergents with proven antimicrobial properties. In addition, the detergents should be used at a concentration high enough to kill the microorganisms. Firstly, to have an efficient killing of the potential pathogen present on the textile but also because concentrations below that required to kill bacteria may lead to the development of detergent tolerance and cross resistance to antibiotics. Controlling the concentration of detergents used in a DLM can be challenging. Indeed, the water volume used by the DLM for the wash cycles are generally unknown and can vary with the wash load. In addition, the quality of the water may affect the efficiency of the domestic detergent. Water hardness has been shown to affect detergent and disinfectant efficacy. Linear alkylbenzene sulfonate is less effective at removing soiling when dissolved in hard water (around 50% and 20% removal on cotton towels and cotton woven textiles respectively) compared to deionised water (around 80% and 40% removal respectively) [9]. The antimicrobial activity of some

disinfectant can also be negatively affected by the water hardness, whereby sodium hypochlorite achieves a lower level of disinfection against *E. coli* and SARS-CoV-2 when in hard water [28,29]. Detergent manufacturers give instructions based on washing load, soiling level and water hardness but those instructions can be difficult to understand or follow when the individual doesn't know the DLM features and the water quality in their area.

For HCW, an underperforming DLM is an important issue when considering uniform laundering. Indeed, there are several examples of the role of textile, in particular garments, in the spreading of pathogenic bacteria in healthcare settings. In 2012, an anaesthetic nurse's scrubs were identified as responsible of spreading *G. bronchialis* to 3 patients [10]. Although, the nurse's DLM couldn't be tested for the presence of the bacteria, the bacteria strain was found on the nurse's body and scrubs and the outbreak stopped after the disposal of their washing machine. More recently, in 2019, a  $\beta$ -lactamase producing *Klebsiella oxytoca* strain spread through a paediatric ward with 13 new-borns and one child testing positive [11]. The bacterium was detected inside the DLM used in the ward to wash the newborn hats and socks, as well as being detected in two sinks. As with the *G. bronchialis* case, the spread of the bacteria was stopped by removing the contaminated washing machine.

Pathogenic bacteria transmission can originate from healthcare settings, however, DLMs can also be a potential source of contamination due to them having their own microbiome. Among the 12 DLMs selected for this study, four machines could not have their microbiome and resistome analysed due to insufficient DNA concentration in the samples (Table 5). Interestingly, all excluded samples were from DLMs less than 4 years old. Since the volume of DNA extracted is likely associated with the amount of biofilm present at the sampling sites, the observed difference in DNA yield between newer and older machines could be attributed to biofilm accumulation over time, particularly in areas such as the detergent drawer pipe.

Three classes represented >60% of the total bacteria detected in this study: Alphaproteobacteria, Gammaproteobacteria and Actinomycetes (Fig 2). This is consistent with previous observations. Nix et al (2015) analysed the microbiome of 12 DLMs and observed that the Alphaproteobacteria represented in average 35% of the bacteria detected followed by the Gammaproteobacteria (30%) [13]. Similarly, Jacksch et al (2019) observed that the Alphaproteobacteria and the Gammaproteobacteria classes were the most abundant with 17.5% and 57.8% respectively [14]. A more recent study by Chen et al (2024) which analysed dormitory washing machine filters, found that Proteobacteria were the major bacteria detected in the machine filters with an average abundance of 74.73% [15]. The authors also explored the antibiotic resistance gene content of the washing machines and they observed that all the machines were positive for the presence of antibiotic resistance genes with the highest abundance observed for efflux pumps and target alteration genes. An earlier study (2020) looking for specific antibiotic resistance genes (Beta-lactamases) in 54 DLMs detected the presence of antibiotic resistance genes in 66.6% of the DLMs [16]. In accordance with previous published data, the presence of antibiotic resistance genes was also detected in all the DLMs tested during this study with a higher abundance of efflux pumps and target modification genes. Interestingly, the presence of potentially pathogenic genera was also detected in the DLMs microbiome especially *Mycobacterium*, *Pseudomonas* and *Acinetobacter* genera. The combined presence of potentially pathogenic bacteria and antibiotic resistance genes in DLMs raises the question of the potential risk that underperforming DLMs represents for the laundering of HCW uniforms in domestic settings. The misuse of domestic laundry detergents could also be a potential source of the transmission of antimicrobial resistance.

Indeed, repeated exposure to stable increases of non-biological domestic laundry detergents led to the induction of antibiotic cross-resistance in both *S. aureus* and *K. pneumoniae*. Sub-lethal concentrations of powder detergent led to the resistance of *K. pneumoniae* to both

carbapenem antibiotics tested: Ertapenem 10µg (a ZoI reduction of 10.38mm) and Meropenem 10µg (a ZoI reduction of 14.13mm) (Fig 5). This combination of resistances suggests *K. pneumoniae* has become a Carbapenem-Resistant Enterobacteriaceae (CRE). To be considered a CRE, the Enterobacteriaceae must be not susceptible to at least one carbapenem antibiotic [30]. This is of concern as carbapenems are often used as last line clinical options for treatment [31]. Antibiotic cross-resistance was induced irrespective of which detergent was used in *S. aureus*. The liquid detergent assay led to the induction of resistance towards Moxifloxacin 5µg, Fusidic Acid 10µg, and Penicillin G 1 unit. Whilst resistance was generated in the powder detergent assay to Tetracycline 30µg, Rifampicin 5µg, Penicillin G 1 unit, and Oxacillin 5µg (Fig 6). These new resistance patterns suggest the original methicillin-sensitive *S. aureus* strain has become a methicillin-resistant *S. aureus* (MRSA) strain following exposure to both liquid and powder detergent; this is inferred by the induction of  $\beta$ -lactam resistance (Penicillin G 1 unit 29.08mm-24.76mm and 29.08mm-23.33mm, Oxacillin 5µg 26.27mm-19.55mm) [32]. Despite methicillin not being tested, oxacillin is used as an alternative for antibiotic susceptibility testing [33]. Exposure to both detergents also led to the loss of resistance of *S. aureus* towards the Oxazolidinone Linezolid 10µg (a ZoI increase of 0.93mm in liquid detergent, and 9.43mm in powder detergent). This antibiotic is used against various Gram-positive bacteria including MRSA, particularly in cases of bacteraemia, necrotizing pneumonia, joint/bone infections, and skin infections [34,35]. The induction of antibiotic resistances in the tested microorganisms is supported by previous studies investigating links between biocide tolerance and cross resistance to antibiotics. Henly *et al.*, (2019) identified six occurrences of cross-resistance to antibiotics when assessing the long-term effects of benzalkonium chloride and triclosan against *E. coli* [36]. Similarly, Kampf (2018) was able to induce cross-resistance to antibiotics in Gram-negative species after exposure to 13 different biocides [37]. In another study 43% of the strains tested showed a decrease in susceptibility to antibiotics after exposure to biocides such as glutaraldehyde, chlorhexidine, and benzalkonium chloride, along with increased capacity for biofilm formation in those antibiotic-resistant strains [38].

The ability of bacteria to tolerate increasing concentrations of detergents showed variation depending on whether they were exposed to powder or liquid detergents. This is evident in Table 2 where the percentage increase in concentration was 50% (*S. aureus*), 128% (*K. pneumoniae*), and 50% (*P. aeruginosa*) when exposed to powder detergent; liquid detergent however, demonstrated increases in concentration of 89,000% against *S. aureus*, >1.5m% against *K. pneumoniae*, and 30,000% against *P. aeruginosa*. The stated concentration increases are impacted by the number of exposures that took place. Both *S. aureus* assays stopped at 15 exposures. This is comparable to *K. pneumoniae* when exposed to powder detergent (15 exposures), but not to *P. aeruginosa*, which had 20 exposures. This was due to *P. aeruginosa* surviving for a longer period against the presence of the powder detergent. Previous studies have identified a difference in antimicrobial efficacy between detergents that contain activated oxygen bleach (AOB), and those that do not [39]. When washing at 30°C, a  $\log_{10}$  reduction of less than 1 was observed in liquid detergent not containing AOB, compared to a  $\log_{10}$  reduction of 6.3 (with a pre-wash) and 3.1 (without pre-wash) using detergent pearls containing AOB. Similarly, a difference of 4  $\log_{10}$  (pre-wash) and 2  $\log_{10}$  (without pre-wash) was identified at 60°C between the two detergents [40].

Exposure to domestic detergent powder leads to varying effects on antibiotic tolerance and resistance. In *K. pneumoniae* most antibiotics exhibited a reduction in ZoI, but increases were noted in Aztreonam 30µg, Amikacin 30µg, and sulphatriad 200µg. No increases in ZoI were present in *P. aeruginosa* following powder detergent exposure. The opposite effect was observed for *S. aureus*; where there were 10 instances of a ZoI increase and just 5 decreases in ZoI (4 of which were the induction of antibiotic cross-resistance).

WGS of *S. aureus* uncovered a single nucleotide polymorphism (SNP) present within the *MgrA* gene following exposure to domestic liquid detergent. A change of the MgrA protein sequence is induced, changing arginine to histidine, which may impact its function. *MgrA* is a major global regulator of *S. aureus*, it has been linked to increased virulence and antibiotic resistance as it regulates efflux pumps, including *NorA* which is involved in quinolone resistance [41,42]. *K. pneumoniae* sequencing led to the identification of an SNP located within the *AcrB* gene after powder detergent exposure. This SNP substitute a stop codon found within the pre-exposure *K. pneumoniae* with a tryptophan. The presence of a stop codon in the protein sequence shortened the length of the protein by introducing an early termination of the translation. The presence of this stop codon in the isolates that were not exposed to detergents likely means that the protein was non-functional. The substitution of the stop codon with a tryptophan may lead to the recovery of the protein function. The *AcrB* gene encodes for a subunit of the AcrAB efflux pump which has been previously identified as being involved in resistance to a range of antibiotics including  $\beta$ -lactams, aminoglycosides, and quinolones [43,44]. The recovery of the AcrAB efflux pump function provides a possible explanation for the increased tolerance observed for Moxifloxacin (ZoI -4.3mm) and Ciprofloxacin (ZoI -4.4mm).

Further investigation on the functional impact of the mutations detected in *S. aureus* and *K. pneumoniae* genomes after exposure to the detergent are required to clarify the role of the mutations in detergent tolerance and antibiotic resistance.

The upregulation of efflux pumps could be a driver in the cross-resistances observed in *S. aureus* and *K. pneumoniae*. Quaternary ammonium compounds (QACs) are one major component found commonly in laundry detergents [22]. Studies have linked QACs to the development of cross-resistance in *S. aureus* via the upregulation of efflux pump genes, notably *NorA*. A change in regulation of *NorA* would influence *S. aureus* susceptibility to antibiotics as this efflux pump confers resistance to fluoroquinolones,  $\beta$ -lactams, tetracyclines, chloramphenicol, and macrolides [45]. Interestingly, increased tolerance to tetracycline and Rifampicin were observed in *S. aureus* after exposure to the powder detergent which could be linked to upregulation of the *NorA* gene (Fig 5, Table S3). The genetic modification observed in *S. aureus* and *K. pneumoniae* can only partially explain the increased tolerance to antibiotics observed during the induction assay. Gene expression investigations are required to give more insight into the potential role of the upregulation/downregulation in the antibiotic tolerance variation.

An important point to consider is that DLMs are developed and marketed to achieve an aesthetic cleaning of domestic laundry. The machines are not specifically designed to achieve microbiological disinfection. Similarly, domestic detergents if not specifically marketed as antimicrobial are designed to cleanse domestic textile items while preserving as much as possible the textile integrity rather than to achieve disinfection. The combination of the many different DLMs on the market, with the many different detergents, and the variety of machine programmes that can be selected by the consumer creates uncertainty in the level of disinfection that can be achieved using DLMs ( $0 \log_{10}$ – $6 \log_{10}$  reductions in the relatively small number of combinations used in this paper).

Only DLMs from standard households, not HCW-associated homes, were tested. HCW household DLMs may exhibit different microbiome and resistome profiles, with the possibility of HCW uniforms introducing greater antibiotic-resistant organisms into the DLMs from the healthcare setting. The tested DLMs' poor performance and microbiome profile is a strong indicator that similar will be occurring in those households where HCWs reside. Further research should explore microbial exchange between garments and DLMs, including genetic transfer, to better assess the risks of DLM failure in decontaminating healthcare uniforms.

The inability of domestic laundering machines (DLMs) and household detergents to effectively disinfect healthcare workers' uniforms poses significant infection control challenges and raises concerns about the potential emergence of antimicrobial resistance. Healthcare workers' uniforms can serve as fomites for pathogenic microorganisms, transferring them from hospital environments to DLMs. If these microorganisms are not effectively eradicated during laundering, they can contaminate the DLM, spread to other garments, and potentially return to healthcare settings, exposing patients to harmful pathogens and increasing the risk of infection.

Moreover, the interaction between the DLM microbiome and bacterial tolerance to domestic detergents may facilitate cross-resistance or genetic transfer, further contributing to the development of antimicrobial resistance. These risks are exacerbated by findings that many DLMs fail to achieve the recommended temperatures for disinfecting healthcare uniforms, combined with the misuse or poor quality of domestic detergents.

To mitigate these risks, current guidelines for laundering healthcare worker uniforms should be revised. Key recommendations are outlined in Table 8 including; regularly cleaning DLMs to reduce biofilm accumulation and microbial contamination, using detergents with proven disinfection efficacy, providing HCW with a list of approved detergents or directly supply detergents/disinfectants with antimicrobial efficacy and prioritising onsite or industrial laundering of healthcare uniforms, where regular monitoring and maintenance of laundering systems can ensure optimal disinfection. It is important to note that even if recommendations for domestic laundering of HCW uniforms are implemented, there remains a significant risk

**Table 8. Recommendations for the laundering of the healthcare workers uniforms.**

| Healthcare workers                                                                                                               |                                                                                                                                      | Healthcare workers employer                                                                                                                                                                               |                                                                                                                                                                                                           |
|----------------------------------------------------------------------------------------------------------------------------------|--------------------------------------------------------------------------------------------------------------------------------------|-----------------------------------------------------------------------------------------------------------------------------------------------------------------------------------------------------------|-----------------------------------------------------------------------------------------------------------------------------------------------------------------------------------------------------------|
| Recommendations                                                                                                                  | Reasons                                                                                                                              | Recommendations                                                                                                                                                                                           | Reasons                                                                                                                                                                                                   |
| Do not use short cycles                                                                                                          | Short cycles are more likely to underperform                                                                                         | Establish a list of domestic detergents/ supply detergents, that are proven to provide chemical disinfection at room temperature with contact time typical to those found in short cycle wash programmes. | To ensure that disinfection can be achieved in DLMs that do not reach the requested programme temperature in the minimum contact time typically found in DLMs                                             |
| If relying on thermal killing select cycle temperature >70°C                                                                     | By targeting 70°C it is more likely that the temperature will at least reach >60°C for 10min                                         | Offer a servicing and performance (temperature monitoring) check of healthcare workers DLM.                                                                                                               | Ensuring that healthcare uniforms are being disinfected effectively.                                                                                                                                      |
| Disinfect and clean DLM regularly with washing machine cleanser and/or by performing a very high temperature empty wash (>90 °C) | Cleaning the DLM regularly aids with reducing biofilm formation                                                                      | Offer On Premise Laundering (OPL) with a regularly controlled washing machine (performance and biofilm formation) and efficient detergent                                                                 | By offering OPL the employer will have control over the decontamination performance of healthcare uniforms in term of thermal and chemical disinfection                                                   |
| Do not mix the laundering of uniforms with any other garment.                                                                    | Avoid the possibility of cross contamination                                                                                         | Outsource the laundering of healthcare uniforms to industrial laundries accredited to BS EN 14065:2016. Textiles - Laundry processed textiles - Biocontamination control system [46]                      | Industrial laundries are obligated to check the performance of their laundering process and ensure disinfection is achieved                                                                               |
| Renew the DLM regularly preferably every four years                                                                              | DLM performance reduces over time and regular renewing of the DLM will ensure that the laundry is performed under optimal conditions | Source uniforms that can be laundered at temperatures at or above 60°C                                                                                                                                    | A combination of thermal and chemical disinfection provides more effective cleaning for healthcare uniforms, but it can only be applied if the uniform's textile can withstand the process without damage |
|                                                                                                                                  |                                                                                                                                      | If laundry is performed on-site without performance controls in place, the DLM should be renewed regularly, ideally every four years.                                                                     | DLM performance reduces over time and regular renewing of the DLM will ensure that the laundry is performed in optimal conditions                                                                         |

<https://doi.org/10.1371/journal.pone.0321467.t008>



that household machines may not reach the required temperature for effective microorganism decontamination. Preference should be given to on-site or industrial laundering, where professionally installed commercial equipment ensures controlled, monitored, and regulated wash parameters. Additionally, industrial laundries adhering to BS EN 14065:2016 standards provide controlled decontamination, ultimately improving the laundering process and reducing the risk of infectious disease transmission [46].

By implementing these measures, healthcare settings can reduce the risk of infection transmission and the potential increased antibiotic resistance associated with inadequate laundering of healthcare uniforms. Ensuring the thorough disinfection of healthcare uniforms is crucial for protecting both patients and healthcare workers from avoidable infections.

## Supporting information

**S1 Fig. Schematic representation of the bioinformatic analysis performed on the DLM shotgun metagenomic sequences.**

(TIF)

**S2 Fig. Temperature profile of DLMs during short and standard wash cycles.**

(TIF)

**S1 Table. *Pseudomonas aeruginosa* antibiotic susceptibility profile before and after long-term exposure to domestic detergent.**

(DOCX)

**S2 Table. *Klebsiella pneumoniae* antibiotic susceptibility profile before and after long-term exposure to domestic detergent.**

(DOCX)

**S3 Table. *Staphylococcus aureus* antibiotic susceptibility profile before and after long-term exposure to domestic detergent.**

(DOCX)

**S1 File. Supplementary methods.**

(DOCX)

## Acknowledgments

Thank you to Ekene Valentine Okonkwo for his laboratory support

## Author contributions

**Conceptualization:** Lucy Owen, Katie Laird.

**Data curation:** Caroline Cayrou, Katie Silver, Lucy Owen, Jake Dunlop.

**Formal analysis:** Caroline Cayrou, Katie Silver, Lucy Owen, Jake Dunlop, Katie Laird.

**Funding acquisition:** Katie Laird.

**Investigation:** Caroline Cayrou, Jake Dunlop, Katie Laird.

**Methodology:** Caroline Cayrou, Lucy Owen, Jake Dunlop, Katie Laird.

**Project administration:** Caroline Cayrou, Katie Laird.

**Resources:** Katie Laird.

**Supervision:** Katie Laird.

**Validation:** Caroline Cayrou, Katie Laird.



**Visualization:** Caroline Cayrou, Jake Dunlop, Katie Laird.

**Writing – original draft:** Caroline Cayrou, Jake Dunlop, Katie Laird.

**Writing – review & editing:** Caroline Cayrou, Katie Silver, Lucy Owen, Jake Dunlop, Katie Laird.

## References

1. Antimicrobial Resistance Division, Impact Initiatives and Research Coordination. WHO bacterial priority pathogens list, 2024: Bacterial pathogens of public health importance to guide research, development and strategies to prevent and control antimicrobial World Health Organization; 2024 May. ISBN: 978-92-4-009346-1. Licence: CC BY-NC-SA 3.0 IGO.
2. Denissen J, Reyneke B, Waso-Reyneke M, Havenga B, Barnard T, Khan S, et al. Prevalence of ESKAPE pathogens in the environment: Antibiotic resistance status, community-acquired infection and risk to human health. *Int J Hyg Environ Health*. 2022;244:114006. <https://doi.org/10.1016/j.ijheh.2022.114006> PMID: [35841823](https://pubmed.ncbi.nlm.nih.gov/35841823/)
3. Fijan S, Turk SŠ. Hospital textiles, are they a possible vehicle for healthcare-associated infections?. *Int J Environ Res Public Health*. 2012;9(9):3330–43. <https://doi.org/10.3390/ijerph9093330> PMID: [23202690](https://pubmed.ncbi.nlm.nih.gov/23202690/)
4. Riley K, Williams J, Owen L, Shen J, Davies A, Laird K. The effect of low-temperature laundering and detergents on the survival of *Escherichia coli* and *Staphylococcus aureus* on textiles used in healthcare uniforms. *J Appl Microbiol*. 2017;123(1):280–6. <https://doi.org/10.1111/jam.13485> PMID: [28489297](https://pubmed.ncbi.nlm.nih.gov/28489297/)
5. Das I, Lambert P, Hill D, Noy M, Bion J, Elliott T. Carbapenem-resistant *Acinetobacter* and role of curtains in an outbreak in intensive care units. *J Hosp Infect*. 2002;50(2):110–4. <https://doi.org/10.1053/jhin.2001.1127> PMID: [11846537](https://pubmed.ncbi.nlm.nih.gov/11846537/)
6. Balm MND, Jureen R, Teo C, Yeoh AEJ, Lin RTP, Dancer SJ, et al. Hot and steamy: outbreak of *Bacillus cereus* in Singapore associated with construction work and laundry practices. *J Hosp Infect*. 2012;81(4):224–30. <https://doi.org/10.1016/j.jhin.2012.04.022> PMID: [22704635](https://pubmed.ncbi.nlm.nih.gov/22704635/)
7. Owen L, Apps L, Stanulewicz N, Hall A, Laird K. Health care worker knowledge and attitudes towards uniform laundering during the COVID-19 pandemic. *Am J Infect Control*. 2022;50(5):525–35. <https://doi.org/10.1016/j.ajic.2021.12.017> PMID: [34971711](https://pubmed.ncbi.nlm.nih.gov/34971711/)
8. National Health Service (NHS). Uniforms and workwear: guidance for NHS employers. London: NHS. 2020.
9. Gotoh K, Horibe K, Mei Y, Tsujisaka T. Effects of Water Hardness on Textile Detergency Performance in Aqueous Cleaning Systems. *J Oleo Sci*. 2016;65(2):123–33. <https://doi.org/10.5650/jos.ess15168> PMID: [26782305](https://pubmed.ncbi.nlm.nih.gov/26782305/)
10. Wright SN, Gerry JS, Busowski MT, Klocho AY, McNulty SG, Brown SA, et al. *Gordonia bronchialis* sternal wound infection in 3 patients following open heart surgery: intraoperative transmission from a healthcare worker. *Infect Control Hosp Epidemiol*. 2012;33(12):1238–41. <https://doi.org/10.1086/668441> PMID: [23143362](https://pubmed.ncbi.nlm.nih.gov/23143362/)
11. Schmithausen RM, Sib E, Exner M, Hack S, Rösing C, Ciorba P, et al. The Washing Machine as a Reservoir for Transmission of Extended-Spectrum-Beta-Lactamase (CTX-M-15)-Producing *Klebsiella oxytoca* ST201 to Newborns. *Appl Environ Microbiol*. 2019;85(22):e01435–19. <https://doi.org/10.1128/AEM.01435-19> PMID: [31562168](https://pubmed.ncbi.nlm.nih.gov/31562168/)
12. Gattlen J, Amberg C, Zinn M, Mauclair L. Biofilms isolated from washing machines from three continents and their tolerance to a standard detergent. *Biofouling*. 2010;26(8):873–82. <https://doi.org/10.1080/08927014.2010.524297> PMID: [20954022](https://pubmed.ncbi.nlm.nih.gov/20954022/)
13. Nix ID, Frontzek A, Bockmühl DP. Characterization of Microbial Communities in Household Washing Machines. *Tenside Surfactants Detergents*. 2015;52(6):432–40. <https://doi.org/10.3139/113.110394>
14. Jacksch S, Kaiser D, Weis S, Weide M, Ratering S, Schnell S, et al. Influence of Sampling Site and other Environmental Factors on the Bacterial Community Composition of Domestic Washing Machines. *Microorganisms*. 2019;8(1):30. <https://doi.org/10.3390/microorganisms8010030> PMID: [31877898](https://pubmed.ncbi.nlm.nih.gov/31877898/)
15. Chen W, Zhang Y, Mi J. Assessing antibiotic-resistant genes in university dormitory washing machines. *Microorganisms*. 2024;12(6):1112.
16. Schages L, Lucassen R, Wichern F, Kalscheuer R, Bockmühl D. The Household Resistome: Frequency of  $\beta$ -Lactamases, Class 1 Integrins, and Antibiotic-Resistant Bacteria in the Domestic

- Environment and Their Reduction during Automated Dishwashing and Laundering. *Appl Environ Microbiol.* 2020;86(23):e02062-20. <https://doi.org/10.1128/AEM.02062-20> PMID: 32978137
17. Usui M, Yoshii Y, Thiriet-Rupert S, Ghigo J-M, Beloin C. Intermittent antibiotic treatment of bacterial biofilms favors the rapid evolution of resistance. *Commun Biol.* 2023;6(1):275. <https://doi.org/10.1038/s42003-023-04601-y> PMID: 36928386
  18. Maillard J. Resistance of Bacteria to Biocides. In: Schwarz S, Cavaco LM, Shen J, editors. *Antimicrobial Resistance in Bacteria from Livestock and Companion Animals*. United States: ASM Press; 2018. pp. 109-26.
  19. Coombs K, Rodriguez-Quijada C, Clevenger JO, Sauer-Budge AF. Current Understanding of Potential Linkages between Biocide Tolerance and Antibiotic Cross-Resistance. *Microorganisms.* 2023;11(8):2000. <https://doi.org/10.3390/microorganisms11082000> PMID: 37630560
  20. Adkin P, Hitchcock A, Smith LJ, Walsh SE. Priming with biocides: A pathway to antibiotic resistance?. *J Appl Microbiol.* 2022;133(2):830–41. <https://doi.org/10.1111/jam.15564> PMID: 35384175
  21. Osman M, El-Hendawy H, El-All S. Correlation between resistance of *Pseudomonas aeruginosa* to benzalkonium chloride and expression of efflux pump genes. *J Appl Pharm Sci.* 2018;8(12):44–52.
  22. Owen L, Cayrou C, Page G, Grootveld M, Laird K. Development of a standardised international protocol for evaluation of the disinfection efficacy of healthcare laundry wash processes. *Applied Microbiology.* 2024;4(1):194–214.
  23. Walsh SE, Maillard J-Y, Russell AD, Catrenich CE, Charbonneau DL, Bartolo RG. Development of bacterial resistance to several biocides and effects on antibiotic susceptibility. *J Hosp Infect.* 2003;55(2):98–107. [https://doi.org/10.1016/s0195-6701\(03\)00240-8](https://doi.org/10.1016/s0195-6701(03)00240-8) PMID: 14529633
  24. European Committee on Antimicrobial Susceptibility Testing. EUCAST Disk Diffusion Method for Antimicrobial Susceptibility Testing. Version 12. 2024. Available from: <https://eucastrg.org>.
  25. European Committee on Antimicrobial Susceptibility Testing. Data from the EUCAST clinical breakpoint and dosing website. [Cited Dec 2024]. Available from: <https://eucastrg.org>.
  26. Lakdawala N, Pham J, Shah M, Holton J. Effectiveness of low-temperature domestic laundry on the decontamination of healthcare workers' uniforms. *Infect Control Hosp Epidemiol.* 2011;32(11):1103–8. <https://doi.org/10.1086/662183> PMID: 22011538
  27. Patel SN, Murray-Leonard J, Wilson APR. Laundering of hospital staff uniforms at home. *J Hosp Infect.* 2006;62(1):89–93. <https://doi.org/10.1016/j.jhin.2005.06.002> PMID: 16214262
  28. Morris JN, Esseili MA. The Effect of Water Hardness and pH on the Efficacy of Peracetic Acid and Sodium Hypochlorite against SARS-CoV-2 on Food-Contact Surfaces. *Foods.* 2023;12(16):2981. <https://doi.org/10.3390/foods12162981> PMID: 37627980
  29. Pangloli P, Hung Y-C. Effects of water hardness and pH on efficacy of chlorine-based sanitizers for inactivating *Escherichia coli* O157:H7 and *Listeria monocytogenes*. *Food Control.* 2013;32(2):626–31. <https://doi.org/10.1016/j.foodcont.2013.01.044>
  30. Durante-Mangoni E, Andini R, Zampino R. Management of carbapenem-resistant Enterobacteriaceae infections. *Clin Microbiol Infect.* 2019;25(8):943–50. <https://doi.org/10.1016/j.cmi.2019.04.013> PMID: 31004767
  31. Sheu C, Chang Y, Lin S, Chen Y, Hsueh P. Infections Caused by Carbapenem-Resistant Enterobacteriaceae: An Update on Therapeutic Options. *Front Microbiol.* 2019; 10:80.
  32. Vestergaard M, Frees D, Ingmer H. Antibiotic Resistance and the MRSA Problem. *Microbiol Spectr.* 2019;7(2):10.1128/microbiolspec.gpp3-00570-2018. <https://doi.org/10.1128/microbiolspec.GPP3-0057-2018> PMID: 30900543
  33. Brown DFJ, Edwards DI, Hawkey PM, Morrison D, Ridgway GL, Towner KJ, et al. Guidelines for the laboratory diagnosis and susceptibility testing of methicillin-resistant *Staphylococcus aureus* (MRSA). *J Antimicrob Chemother.* 2005;56(6):1000–18. <https://doi.org/10.1093/jac/dki372> PMID: 16293678
  34. Brown NM, Goodman AL, Horner C, Jenkins A, Brown EM. Treatment of methicillin-resistant *Staphylococcus aureus* (MRSA): updated guidelines from the UK. *JAC Antimicrob Resist.* 2021;3(1):dlaa114. <https://doi.org/10.1093/jacamr/dlaa114> PMID: 34223066
  35. Hashemian SMR, Farhadi T, Ganjparvar M. Linezolid: a review of its properties, function, and use in critical care. *Drug Des Devel Ther.* 2018;12:1759–67. <https://doi.org/10.2147/DDDT.S164515> PMID: 29950810
  36. Henly EL, Dowling JAR, Maingay JB, Lacey MM, Smith TJ, Forbes S. Biocide Exposure Induces Changes in Susceptibility, Pathogenicity, and Biofilm Formation in Uropathogenic *Escherichia coli*. *Antimicrob Agents Chemother.* 2019;63(3):e01892-18. <https://doi.org/10.1128/AAC.01892-18> PMID: 30642923

37. Kampf G. Biocidal Agents Used for Disinfection Can Enhance Antibiotic Resistance in Gram-Negative Species. *Antibiotics* (Basel). 2018;7(4):110. <https://doi.org/10.3390/antibiotics7040110> PMID: [30558235](https://pubmed.ncbi.nlm.nih.gov/30558235/)
38. Pereira B, Wang X, Tagkopoulos I, Merchel P. Biocide-induced emergence of antibiotic resistance in *Escherichia coli*. *Frontiers in Microbiology*. 2021;12:640923. <https://doi.org/10.3389/fmicb.2021.640923>
39. Honisch M, Stamminger R, Bockmühl DP. Impact of wash cycle time, temperature and detergent formulation on the hygiene effectiveness of domestic laundering. *J Appl Microbiol*. 2014;117(6):1787–97. <https://doi.org/10.1111/jam.12647> PMID: [25207988](https://pubmed.ncbi.nlm.nih.gov/25207988/)
40. Bloomfield S, Exner M, Nath K, Pickup J, Scott E, Signorelli C. Preventing the spread of infectious diseases in the European Union - targeted hygiene as a framework for sustainable hygiene. *International Scientific Forum On Home Hygiene*. 2010.
41. Costa SS, Sobkowiak B, Parreira R, Edgeworth JD, Viveiros M, Clark TG, et al. Genetic Diversity of *norA*, Coding for a Main Efflux Pump of *Staphylococcus aureus*. *Front Genet*. 2019;9:710. <https://doi.org/10.3389/fgene.2018.00710> PMID: [30687388](https://pubmed.ncbi.nlm.nih.gov/30687388/)
42. Kaatz GW, Thyagarajan RV, Seo SM. Effect of promoter region mutations and *mgrA* overexpression on transcription of *norA*, which encodes a *Staphylococcus aureus* multidrug efflux transporter. *Antimicrob Agents Chemother*. 2005;49(1):161–9. <https://doi.org/10.1128/AAC.49.1.161-169.2005> PMID: [15616291](https://pubmed.ncbi.nlm.nih.gov/15616291/)
43. Padilla E, Llobet E, Doménech-Sánchez A, Martínez-Martínez L, Bengoechea JA, Albertí S. *Klebsiella pneumoniae* AcrAB efflux pump contributes to antimicrobial resistance and virulence. *Antimicrob Agents Chemother*. 2010;54(1):177–83. <https://doi.org/10.1128/AAC.00715-09> PMID: [19858254](https://pubmed.ncbi.nlm.nih.gov/19858254/)
44. Li Y, Cross TS, Dörr T. Analysis of AcrB in *Klebsiella pneumoniae* reveals natural variants promoting enhanced multidrug resistance. *Res Microbiol*. 2022;173(3):103901. <https://doi.org/10.1016/j.res-mic.2021.103901> PMID: [34863884](https://pubmed.ncbi.nlm.nih.gov/34863884/)
45. Rao M, Padyana S, Dipin K, Kumar S, Nayak B, Varela M. Antimicrobial compounds of plant origin as efflux pump inhibitors: New avenues for controlling multidrug resistant pathogens. *J Antimicrob Agents*. 2018;4(1):1000159. <https://doi.org/10.1016/j.jaap.2018.1000159>
46. British Standards Institute. BS EN 14065:2016. Textiles - Laundry processed textiles - Biocontamination control system. London: BSI. 2016.
